# Supplementary material
Source: PubMed Central journal article supplement (PMC4156756)
Supplement: 1411817111_pnas.201411817SI.pdf [file 1411817111_pnas.201411817SI.pdf]

# Supporting Information

Rao et al. 10.1073/pnas.1411817111

## SI Text

### Surface Potential Created upon Binding of +8 Charge TAT Peptides to 1-Palmitoyl-2-Oleoyl-*sn*-Glycero-3-Phosphocholine Liposomes and Its Relation to $E_{2\omega}$

Starting with the Poisson–Boltzmann equation (1),

$$\frac{d^2\Phi}{dz^2} = -\frac{\rho(z)}{\epsilon}, \quad [\text{S1}]$$

we consider a system where  $C$  is the concentration of bound TAT,  $C_0$  is the total concentration of TAT, and  $C_0 - C$  is the concentration of TAT in the bulk solution. The counter ions in the solution are  $\text{OH}^-$ , at a concentration  $C_{\text{OH}^-} = 8C_0$ . The Boltzmann distribution expresses the population of ions at a charged surface,

$$\begin{aligned} C_+(z) &= (C_0 - C)e^{-(8e\Phi(z)/kT)} \\ C_-(z) &= C_{\text{OH}^-}e^{e\Phi(z)/kT}. \end{aligned} \quad [\text{S2}]$$

$C_+(z)$  and  $C_-(z)$  are the concentrations of the cations and of the anions at position  $z$ . The charge density  $\rho$  at position  $z$  is thus given by

$$\rho(z) = 8e(C_0 - C)e^{-(8e\Phi(z)/kT)} - 8eC_0e^{e\Phi(z)/kT}. \quad [\text{S3}]$$

Substituting Eq. S3 into [S1] yields

$$\frac{d^2\Phi}{dz^2} = -\frac{8e(C_0 - C)}{\epsilon}e^{-(8e\Phi/kT)} + \frac{8eC_0}{\epsilon}e^{e\Phi/kT}. \quad [\text{S4}]$$

Multiplying by  $2(d\Phi/dz)$  yields

$$\begin{aligned} 2\frac{d\Phi}{dz}\frac{d^2\Phi}{dz^2} &= \left[ -\frac{8e(C_0 - C)}{\epsilon}e^{-(8e\Phi/kT)} + \frac{8eC_0}{\epsilon}e^{e\Phi/kT} \right] 2\frac{d\Phi}{dz} \\ \frac{d}{dz}\left(\frac{d\Phi}{dz}\right)^2 &= \left[ -\frac{8e(C_0 - C)}{\epsilon}e^{-(8e\Phi/kT)} + \frac{8eC_0}{\epsilon}e^{e\Phi/kT} \right] 2\frac{d\Phi}{dz}. \end{aligned} \quad [\text{S5}]$$

Integrating from 0 to  $\infty$ , the left side of Eq. S5 from 0 to  $\infty$  results in

$$\int_0^\infty \frac{d}{dz}\left(\frac{d\Phi}{dz}\right)^2 dz = \left(\left(\frac{d\Phi}{dz}\right)^2\right)_\infty - \left(\left(\frac{d\Phi}{dz}\right)^2\right)_0 = -\left(\left(\frac{d\Phi}{dz}\right)^2\right)_0. \quad [\text{S6}]$$

The right side in Eq. S5 becomes

$$\begin{aligned} \int_0^\infty \left[ -\frac{8e(C_0 - C)}{\epsilon}e^{-(8e\Phi/kT)} + \frac{8eC_0}{\epsilon}e^{e\Phi/kT} \right] 2\frac{d\Phi}{dz} dz \\ = -\frac{16e(C_0 - C)}{\epsilon} \left(\frac{-kT}{8e}\right) \left(1 - e^{-(8e\Phi(0)/kT)}\right) \\ + \frac{16eC_0}{\epsilon} \left(\frac{kT}{e}\right) \left(1 - e^{-(e\Phi(0)/kT)}\right). \end{aligned} \quad [\text{S7}]$$

We then obtain

$$\sigma = -\int_0^\infty \rho dz = \int_0^\infty \epsilon \frac{d^2\Phi}{dz^2} dz = -\epsilon \left(\frac{d\Phi}{dz}\right)_{z=0}. \quad [\text{S8}]$$

Combining Eqs. S6–S8, we get

$$\frac{\sigma^2}{\epsilon^2} = \frac{16e(C_0 - C)}{\epsilon} \frac{kT}{8e} \left(e^{-(8e\Phi/kT)} - 1\right) - \frac{16eC_0}{\epsilon} \frac{kT}{e} \left(1 - e^{-(e\Phi/kT)}\right). \quad [\text{S9}]$$

For  $\Phi \geq 5$  mV,  $e^{-(8e\Phi/kT)}$  is at least a factor of 5 smaller than 1 and is neglected. This yields Eq. S10,

$$\frac{\sigma^2}{\epsilon^2} = -\frac{16e(C_0 - C)}{\epsilon} \frac{kT}{8e} - \frac{16eC_0}{\epsilon} \frac{kT}{e} \left(1 - e^{-(e\Phi/kT)}\right), \quad [\text{S10}]$$

which yields

$$\Phi = \frac{kT}{e} \ln\left(\frac{\sigma^2}{16\epsilon C_0 kT} + \frac{C_0 - C}{8C_0} + 1\right). \quad [\text{S11}]$$

When  $C \ll C_0$ , we obtain

$$\Phi = \frac{kT}{e} \ln\left(\frac{\sigma^2}{16\epsilon C_0 kT} + \frac{9}{8}\right). \quad [\text{S12}]$$

We assume a modified Langmuir binding for TAT onto POPC liposomes. The surface charge density  $\sigma$  is given by (2–4)

$$\sigma = \frac{8eN}{4\pi R^2}, \quad [\text{S13}]$$

where  $N$  is the number of TATs bound per unit volume.

The reaction of TAT with empty sites (ES) yields filled sites (FS),

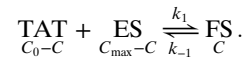

$C_{\text{max}}$  is the maximum bound concentration and  $C$  is the concentration of bound TAT at equilibrium, where  $C = d \times N$ ,  $C_{\text{max}} = d \times N_{\text{max}}$ , and  $d$  is the liposome number per unit volume.

The reaction kinetics are described by

$$\frac{dC}{dt} = k_1 \frac{C_0 - C}{55.5} (C_{\text{max}} - C) - k_{-1}C. \quad [\text{S14}]$$

At equilibrium,

$$\frac{dC}{dt} = 0,$$

which leads to

$$C = \frac{(C_{\text{max}} + C_0 + 55.5K_d) - \sqrt{(C_{\text{max}} + C_0 + 55.5K_d)^2 - 4C_{\text{max}}C_0}}{2}$$

$$N = \frac{(N_{\max} + C_0/d + 55.5K_d/d) - \sqrt{(N_{\max} + C_0/d + 55.5K_d/d)^2 - 4N_{\max}C_0/d}}{2} \quad [\text{S15}]$$

By substituting Eq. S13 into Eq. S12, we obtain the following expression for the surface potential,

$$\begin{aligned} \Phi &= \frac{kT}{e} \ln \left( \frac{\sigma^2}{16\epsilon C_0 kT} + \frac{9}{8} \right) \\ &= \frac{kT}{e} \ln \left( \frac{(8eN/4\pi R^2)^2}{16\epsilon C_0 kT} + \frac{9}{8} \right). \end{aligned} \quad [\text{S16}]$$

The total second harmonic electric field,  $E_{2\omega}$ , originating from a charged interface in contact with water can be expressed as

$$E_{2\omega} \propto \sum_i \chi_{c,i}^{(2)} E_\omega E_\omega + \sum_j \chi_{\text{inc},j}^{(2)} E_\omega E_\omega + \chi_{\text{H}_2\text{O}}^{(3)} E_\omega E_\omega \Phi, \quad [\text{S17}]$$

where  $\chi_{c,i}^{(2)}$  represents the coherent contribution of the second-order susceptibility of the species  $i$  at the interface,  $\chi_{\text{inc},j}^{(2)}$  represents the incoherent contribution of the second-order susceptibility of the species  $j$  present in solution, referred to as the hyper-Rayleigh scattering,  $\chi_{\text{H}_2\text{O}}^{(3)}$  is the third-order susceptibility of water molecules, and  $\Phi$  is the surface potential. The second-order susceptibility,  $\chi_{c,i}^{(2)}$ , can be written as the product of the number of molecules,  $N$ , at the surface and  $\alpha_i^{(2)}$  is the hyperpolarizability of surface species  $i$ , yielding  $\chi_{c,i}^{(2)} = N \langle \alpha_i^{(2)} \rangle$  (5). The bracket,  $\langle \rangle$ , indicates an orientational average over the interfacial molecules.

By substituting Eq. S16 into Eq. S17, we obtain the following expression for  $E_{2\omega}$ , where  $A$  and  $B$  are defined in the text,

$$E_{2\omega} \propto A + B \ln \left( \frac{(8eN/4\pi R^2)^2}{16\epsilon C_0 kT} + \frac{9}{8} \right). \quad [\text{S18}]$$

**Surface Potential of TAT Binding to the 1-Palmitoyl-2-Oleoyl-*sn*-Glycerol-3-Phospho-1'-*rac*-Glycerol Liposomes and Its Relation to  $E_{2\omega}$ .** The concentration of  $\text{Na}^+$  is determined by the number of 1-palmitoyl-2-oleoyl-*sn*-glycerol-3-phospho-1'-*rac*-glycerol (POPG) lipids; i.e., one  $\text{Na}^+$  is released by each POPG lipid that composes the POPG liposome. The spatial distribution of ions is given by

$$\begin{aligned} C_+(z) &= (C_0 - C) e^{-(8e\Phi(z)/kT)} + C_{\text{Na}^+} e^{-(e\Phi(z)/kT)} \\ C_-(z) &= C_{\text{OH}^-} e^{e\Phi(z)/kT}. \end{aligned} \quad [\text{S19}]$$

Thus,

$$\rho(z) = 8e(C_0 - C) e^{-(8e\Phi(z)/kT)} + C_{\text{Na}^+} e^{-(e\Phi(z)/kT)} - 8eC_0 e^{e\Phi(z)/kT}. \quad [\text{S20}]$$

Substituting Eq. S20 into Eq. S1 yields

$$\frac{d^2\Phi}{dz^2} = -\frac{8e(C_0 - C)}{\epsilon} e^{-(8e\Phi/kT)} - \frac{eC_{\text{Na}^+}}{\epsilon} e^{-(e\Phi(z)/kT)} + \frac{8eC_0}{\epsilon} e^{e\Phi/kT}. \quad [\text{S21}]$$

Multiplying by  $2(d\Phi/dz)$  yields

$$\begin{aligned} 2 \frac{d\Phi}{dz} \frac{d^2\Phi}{dz^2} &= \left[ -\frac{8e(C_0 - C)}{\epsilon} e^{-(8e\Phi/kT)} - \frac{eC_{\text{Na}^+}}{\epsilon} e^{-(e\Phi(z)/kT)} \right. \\ &\quad \left. + \frac{8eC_0}{\epsilon} e^{e\Phi/kT} \right] 2 \frac{d\Phi}{dz} \end{aligned} \quad [\text{S22}]$$

$$\begin{aligned} \frac{d}{dz} \left( \frac{d\Phi}{dz} \right)^2 &= \left[ -\frac{8e(C_0 - C)}{\epsilon} e^{-(8e\Phi/kT)} - \frac{eC_{\text{Na}^+}}{\epsilon} e^{-(e\Phi(z)/kT)} \right. \\ &\quad \left. + \frac{8eC_0}{\epsilon} e^{e\Phi/kT} \right] 2 \frac{d\Phi}{dz}. \end{aligned}$$

Integrating from 0 to  $\infty$ , the left side of Eq. S22 becomes

$$\int_0^\infty \frac{d}{dz} \left( \frac{d\Phi}{dz} \right)^2 dz = \left( \left( \frac{d\Phi}{dz} \right)^2 \right)_\infty - \left( \left( \frac{d\Phi}{dz} \right)^2 \right)_0 = - \left( \left( \frac{d\Phi}{dz} \right)^2 \right)_0. \quad [\text{S23}]$$

The surface charge density is given by

$$\sigma = - \int_0^\infty \rho dz = \int_0^\infty \epsilon \frac{d^2\Phi}{dz^2} dz = -\epsilon \left( \frac{d\Phi}{dz} \right)_{z=0}. \quad [\text{S24}]$$

Integrating from 0 to  $\infty$ , the right side of Eq. S22 yields

$$\begin{aligned} 2 \int_0^\infty &\left[ -\frac{8e(C_0 - C)}{\epsilon} e^{-(8e\Phi/kT)} - \frac{eC_{\text{Na}^+}}{\epsilon} e^{-(e\Phi(z)/kT)} \right. \\ &\quad \left. + \frac{8eC_0}{\epsilon} e^{e\Phi/kT} \right] \frac{d\Phi}{dz} dz \\ &= -\frac{2}{\epsilon} \left[ -(C_0 - C)kT \left( 1 - e^{-(8e\Phi(0)/kT)} \right) \right. \\ &\quad \left. - C_{\text{Na}^+}kT \left( 1 - e^{-(e\Phi(0)/kT)} \right) - 8C_0kT \left( 1 - e^{-(e\Phi(0)/kT)} \right) \right]. \end{aligned} \quad [\text{S25}]$$

Combining Eqs. S24 and S25, we obtain

$$\begin{aligned} -\frac{\sigma^2}{\epsilon^2} &= -\frac{2kT}{\epsilon} \left[ -(C_0 - C) \left( 1 - e^{-(8e\Phi(0)/kT)} \right) \right. \\ &\quad \left. - C_{\text{Na}^+} \left( 1 - e^{-(e\Phi(0)/kT)} \right) - 8C_0 \left( 1 - e^{-(e\Phi(0)/kT)} \right) \right] \\ \frac{\sigma^2}{2kT\epsilon} &= -9C_0 - C_{\text{Na}^+} + C + (C_0 - C) e^{-(8e\Phi(0)/kT)} \\ &\quad + C_{\text{Na}^+} e^{-(e\Phi(0)/kT)} + 8C_0 e^{-(e\Phi(0)/kT)}. \end{aligned} \quad [\text{S26}]$$

For the experiments using POPG,

$$\frac{\sigma^2}{2kT\epsilon} = -9C_0 - C_{\text{Na}^+} + (C_0 - C) e^{-(8e\Phi(0)/kT)}.$$

We thereby obtain an expression for the surface potential given by Eq. S27:

$$\Phi = \frac{kT}{8e} \ln \left( \frac{\sigma^2}{2\epsilon C_0 kT} + \frac{C_{\text{Na}^+}}{C_0} + 9 \right). \quad [\text{S27}]$$

We used a modified Langmuir model, Eq. S15, for binding of TAT to POPG liposomes. The surface charge density  $\sigma$  is given by

$$\sigma = \sigma_0 - \sigma_{\text{ads}} = \frac{8eN_{\text{max}}}{4\pi R^2} - \frac{8eN'}{4\pi R^2}. \quad [\text{S28}]$$

By substituting Eq. S28 into Eq. S27, we are able to write the expression

$$\Phi = -\frac{kT}{8e} \ln \left( \frac{\sigma^2}{2\epsilon C_0 kT} + \frac{C_{\text{Na}^+}}{C_0} + 9 \right)$$

1. Ohshima H, Furusawa K, eds (1998) *Electrical Phenomena at Interfaces: Fundamentals, Measurements, and Applications* (Dekker, New York), 2nd Ed.
2. Ong SW, Zhao XL, Eiseenthal KB (1992) Polarization of water-molecules at a charged interface - 2nd harmonic studies of the silica water interface. *Chem Phys Lett* 191(3-4):327-335.
3. Zhao XL, Ong SW, Eiseenthal KB (1993) Polarization of water-molecules at a charged interface - 2nd harmonic studies of charged monolayers at the air-water-interface. *Chem Phys Lett* 202(6):513-520.

$$= -\frac{kT}{8e} \ln \left( \frac{(8eN_{\text{max}}/4\pi R^2 - 8eN'/4\pi R^2)^2}{2\epsilon C_0 kT} + \frac{C_{\text{Na}^+}}{C_0} + 9 \right). \quad [\text{S29}]$$

By substituting Eq. S29 into Eq. S17, we obtain the expression

$$E_{2\omega} \propto A' + B' \ln \left( \frac{(8eN_{\text{max}}/4\pi R^2 - 8eN'/4\pi R^2)^2}{2\epsilon C_0 kT} + \frac{C_{\text{Na}^+}}{C_0} + 9 \right). \quad [\text{S30}]$$

4. Wang HF, Yan ECY, Liu Y, Eiseenthal KB (1998) Energetics and population of molecules at microscopic liquid and solid surfaces. *J Phys Chem B* 102(23):4446-4450.
5. Heinz TF, Chen CK, Ricard D, Shen YR (1982) Spectroscopy of molecular monolayers by resonant 2nd-harmonic generation. *Phys Rev Lett* 48(7):478-481.
